# Supplementary material for: Systematic review of phase‐I/II trials enrolling refractory and recurrent Ewing sarcoma: Actual knowledge and future directions to optimize the research
Source: PubMed Central journal article supplement (PMC7940237; doi:10.1002/cam4.3712), 2021-01-15
Supplement: CAM4-10-1589-s003.pdf [file CAM4-10-1589-s003.pdf]

## Graphical conclusion

*Better understanding ES biology/preclinical model*

### International trials

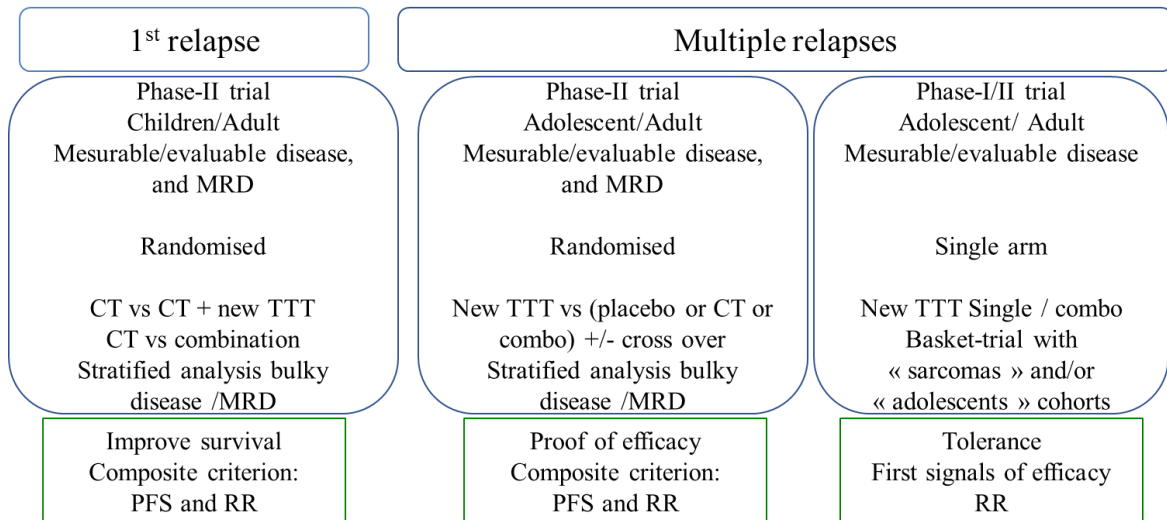

**Figure S4:** Graphical conclusion and proposals for future phase-I/II trials enrolling ES recurrent or refractory patients. *CT: Chemotherapy, MRD: minimal residual disease, TTT: treatment, Combo: combination.*
